# Supplementary material for: Small-size and well-dispersed Fe nanoparticles embedded in carbon rods for efficient oxygen reduction reaction
Source: Royal Society of Chemistry journal article supplement (doi:10.1039/d4cc00119b), 2024-01-01
Supplement: d4cc00119b1.pdf [file d4cc00119b1.pdf]

Supporting Information

Small-size and well-dispersed Fe nanoparticles embedded in carbon rods for efficient oxygen reduction reaction

Xinde Duan, Fayuan Ge, Yang Liu and Hegen Zheng\*

*School of Environmental Science and Engineering, Nanjing University of Information*

*Science & Technology, Jiangsu Key Laboratory of Atmospheric Environment*

*Monitoring and Pollution Control, Collaborative Innovation Center of Atmospheric*

*Environment and Equipment Technology, Nanjing 210044, China*

## S1. Experimental Section

All reagents were analytical grade and used without further purification. All solutions used in electrochemical experiments were prepared with Millipore water ( $\geq 18 \text{ M}\Omega$ ).

### Synthesis of Zn-MOF

A mixture of  $\text{Zn}(\text{NO}_3)_2 \cdot 6\text{H}_2\text{O}$  (14.9 mg, 0.05 mmol), 1,2,4-Benzenetricarboxylic acid (10.5 mg, 0.05 mmol) and MIDPPA (4,4'-di(4-pyridine)-4"-imidazoletriphenylamine) (23.3 mg, 0.05 mmol) was dissolved in 12 mL of DMF/ $\text{H}_2\text{O}$ (1:2, V/V). The final mixture was placed in a Parr Teflon-lined stainless steel vessel (20 mL) under autogenous pressure and heated at 130 °C for 3 d. Large quantity of yellow crystals were obtained, which were washed with mother liquid, and dried under ambient conditions.

### Synthesis of Fe@Zn-MOF

Zn-MOF (10 mg) was placed in a 5-mL glass vial. This vial was placed in a glass bottle containing Fc (1.0, 2.5 and 4.0 mg named as Fe(10)@Zn-MOF, Fe(25)@Zn-MOF and Fe(40)@Zn-MOF). The bottle was sealed and then heated under 150 °C for 24 hours.

### Synthesis of FeZn@NC-m

Fe@Zn-MOF added melamine (mass ratio: 1/10) was carbonized under  $\text{N}_2$  atmosphere in a tube furnace, where the temperature was raised up from 30 °C to 800 °C at a heating rate of 5 °C/min. After holding at 800 °C for 2 hours, the temperature was cooled down to room temperature naturally to afford black powder. When the amount of Fc was tailored to 10, 25, and 40% of the mass of Zn-MOF, the corresponding products were marked as Fe(10)Zn@NC-m, Fe(25)Zn@NC-m, and Fe(40)Zn@NC-m, respectively. Zn@NC was synthesized by calcining Zn-MOF. Zn@NC-m was synthesized by calcining Zn-MOF and melamine.

## Characterizations

Powder X-Ray diffraction (PXRD) patterns were recorded on a D8 DAVANCI X-ray powder diffractometer equipped with graphite monochromatized Cu K $\alpha$  radiation ( $\lambda = 1.5406 \text{ \AA}$ ). The diffractometer was operated with working voltage and current of 40 kV and 40 mA, respectively. Transmission electron microscopy (TEM) and high-resolution TEM (HRTEM) images were recorded on a JEM-2100 apparatus working at an accelerating voltage of 200 kV. Scanning electron microscopy (SEM) was carried out with a S-4800 (JEOL) apparatus working at an acceleration voltage of 2 kV. X-ray photon spectroscopy (XPS) was performed on an ESCA Lab250 X-ray microprobe corrected by C1s peak at 284.6 eV. Nitrogen sorption experiments and pore size distribution (PSD) were measured using an ASAP 2020 surface area detecting instrument by N<sub>2</sub> physisorption at 77 K. Prior to the measurement, the samples were degassed at 120°C for 6 h.

## Electrochemical Measurements

All electrochemical experiments were conducted on a CHI 760 E electrochemical station (Shanghai Chenhua Co., China) in a standard three electrode cell in O<sub>2</sub>-saturated 0.1 M KOH at room temperature. A glassy carbon electrode (GCE, 5 mm in diameter), a Hg/HgO electrode (SCE), and a Pt wire were used as the working, reference and counter electrode, respectively. All electrode potentials were expressed in reference to the reversible hydrogen electrode (RHE). 5 mg of the catalysts were dispersed in 1 mL of 1:1 v/v water/alcohol with 40  $\mu$ L Nafion by sonication to form a homogeneous suspension. Typically, 5  $\mu$ L well-dispersed suspension was dropped on the glassy carbon electrode and then dried in an ambient environment for measurements. Linear sweep voltammetry (LSV) was tested with a scan rate of 10 mV s<sup>-1</sup> at 1600 rpm on rotating disc electrode (RDE). The chronoamperometry (CA) was tested at an overpotential of 0.85 V vs RHE after equilibrium.

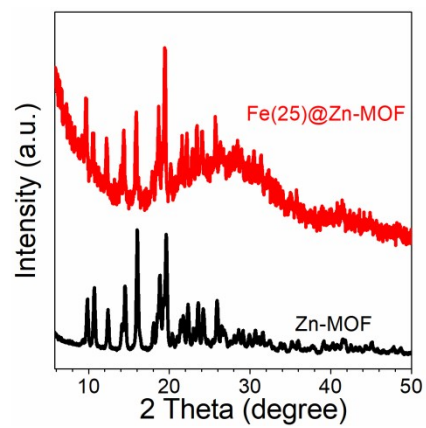

**Fig. S1.** XRD patterns of Zn-MOF and Fe(25)@Zn-MOF.

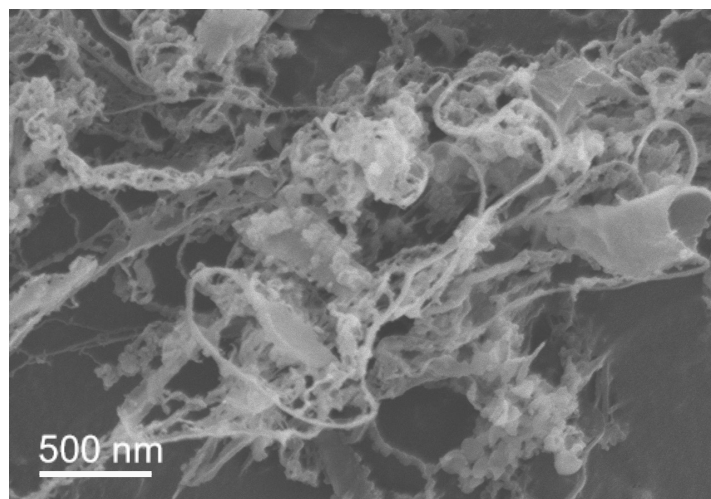

**Fig. S2.** SEM image of Fc.

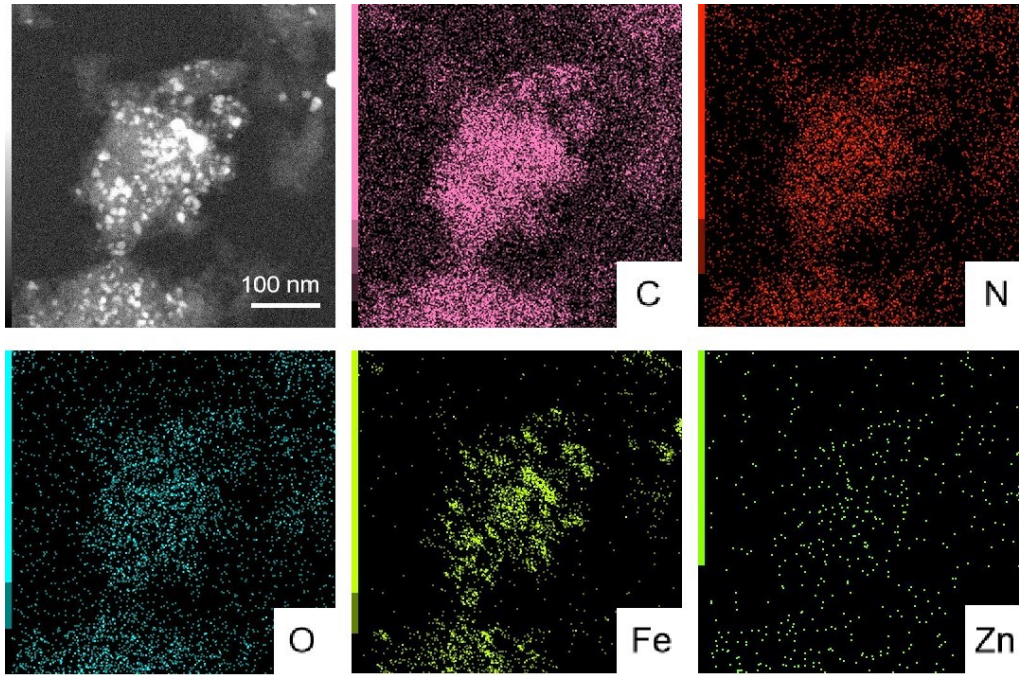

**Fig. S3.** STEM and corresponding elemental mapping images of Fe(25)Zn@NC-m.

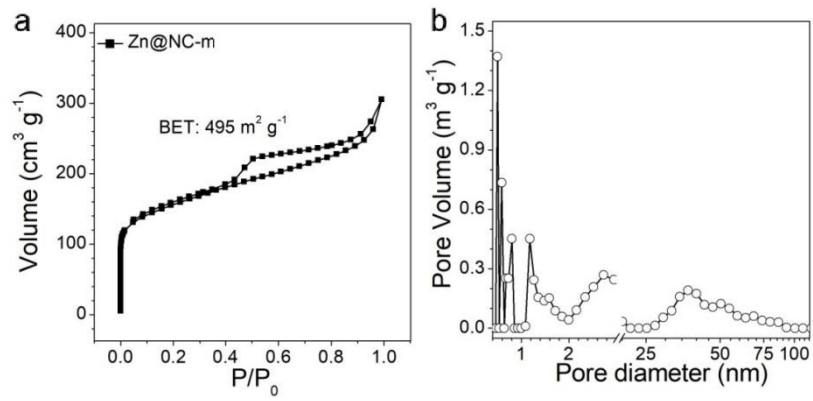

**Fig. S4.** (a)  $N_2$  adsorption–desorption isotherm and (b) pore size distribution of Zn@NC-m.

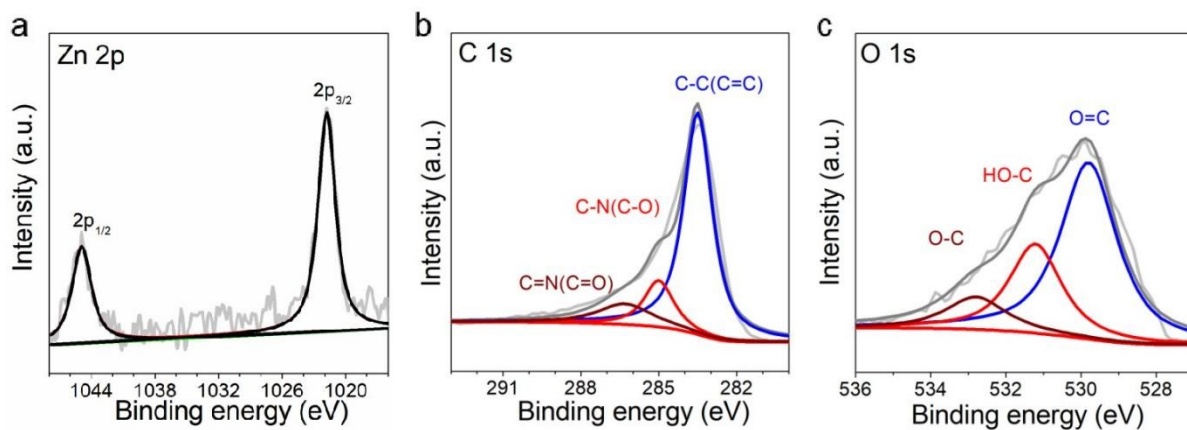

**Fig. S5.** High-resolution (a) Zn 2p, (b) C 1s, and (c) O 1s XPS spectra of Fe(25)Zn@NC-m.

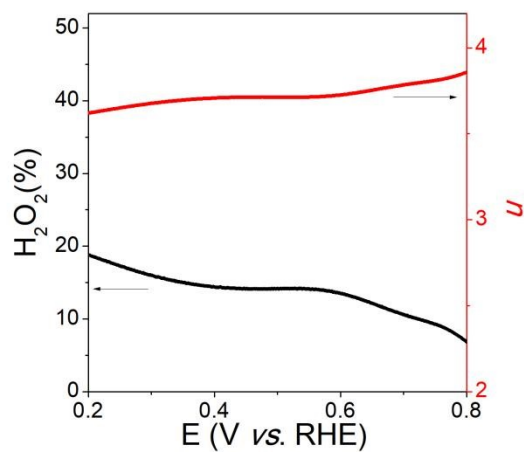

**Fig. S6.**  $\text{H}_2\text{O}_2$  yield and electron transfer number of Fe(25)Zn@NC-m.

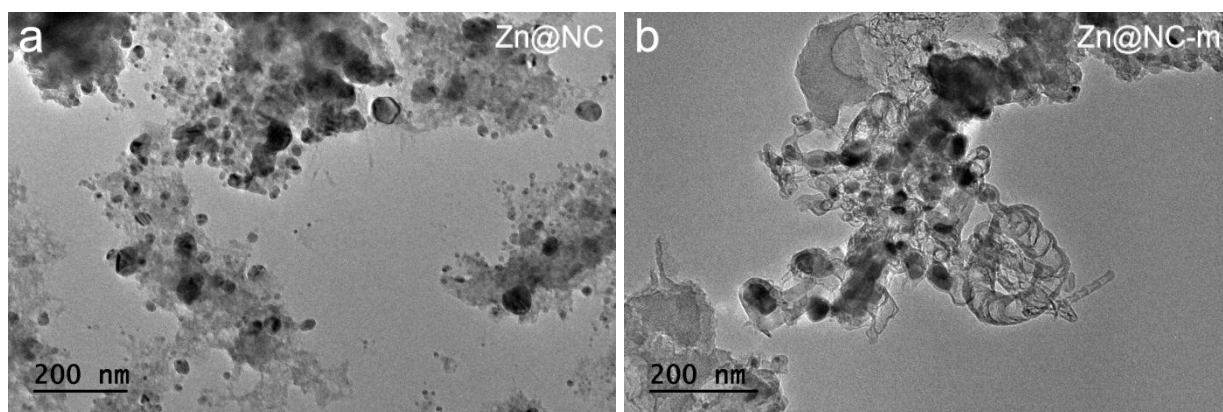

**Fig. S7.** TEM image of (a) Zn@NC and (b) Zn@NC-m.

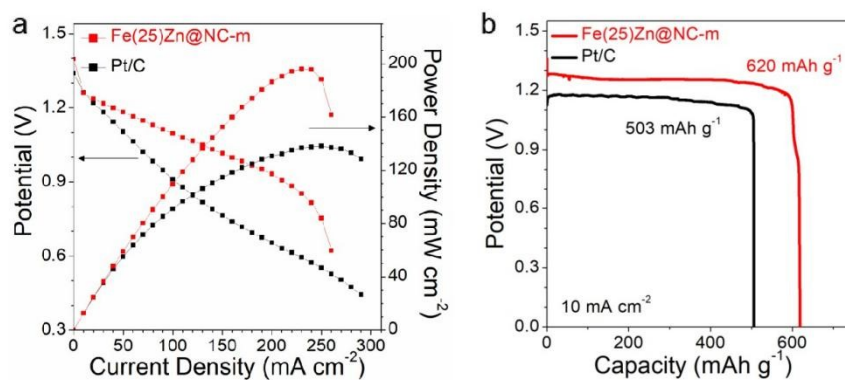

**Fig. S8.** (a) Discharge polarization and power density curves of primary Zn-air battery using Fe(25)Zn@NC-m and Pt/C. (b) Specific capacities of primary Zn-air battery.

**Table S1.** Comparison of ORR catalytic performances of reported Fe-containing catalysts in 0.1 M KOH solution.

| Catalysts                     | $E_{1/2}$ [V] | Reference                                                               |
|-------------------------------|---------------|-------------------------------------------------------------------------|
| Fe(25)Zn@NC-m                 | 0.868         | This work                                                               |
| Fe <sub>1</sub> /N-HCMs       | 0.88          | <i>Small</i> , <b>2023</b> , 19, 2207991.                               |
| NiFe-LDH/Fe <sub>1</sub> -N-C | 0.90          | <i>Adv. Energy Mater.</i> , <b>2023</b> , 13, 2203609.                  |
| Fe-N-C HSs                    | 0.90          | <i>Small</i> , <b>2023</b> , 2305700                                    |
| FeCu-SAC                      | 0.926         | <i>J. Mater. Chem. A</i> , <b>2023</b> , 11, 6191-6197.                 |
| Mn-Fe@NCNTs                   | 0.872         | <i>J. Alloys Compd.</i> , <b>2023</b> , 953, 169992.                    |
| Fe/Fe <sub>3</sub> C@C        | 0.831         | <i>Electrochem. Commun.</i> , <b>2023</b> , 150, 107477.                |
| Fe-NC-Gs                      | 0.85          | <i>Electron. Mater. Lett.</i> , <b>2023</b> , 285.                      |
| Po-FeCo-N-C                   | 0.83          | <i>Materials Science and Engineering B</i> , <b>2023</b> , 290, 116291. |
